# Supplementary material for: How User Characteristics Affect Use Patterns in Web-Based Illness Management Support for Patients with Breast and Prostate Cancer
Source: PubMed Central journal article supplement (PMC3636230; doi:10.2196/jmir.2285), 2013-03-01
Supplement: jmir_v15i3e34_app1.pdf [file jmir_v15i3e34_app1.pdf]

## Multimedia Appendix 1

### Data-driven tertile division of variables that is necessary for latent class analysis models

| Variable                      | Scores        |                  |                |
|-------------------------------|---------------|------------------|----------------|
|                               | Low score/use | Medium score/use | High score/use |
| <b>Social support</b>         | < 73          | 73-92            | >92            |
| <b>Depression</b>             | < 7           | 7-15             | > 15           |
| <b>Symptom distress</b>       | < 19          | 19-37            | >37            |
| <b>Quality of life</b>        | < 0.8         | 0.8 - 0.9        | >0.9           |
| <b>Self efficacy</b>          | < 205         | 205-239          | >239           |
| <b>Assessment duration</b>    | < 8           | 8-23             | >23            |
| <b>Interventions duration</b> | < 9           | 9-26             | >26            |
| <b>Information duration</b>   | < 16          | 16-45            | > 45           |
| <b>Message duration</b>       | < 2           | 2-49             | > 49           |
| <b>Forum duration</b>         | <34           | 34-206           | > 206          |

N ranged between 47 and 57 for social support, depression, quality of life and self-efficacy scores

N ranged between 33 and 35 for the duration variables

Duration displayed in minutes

**Distribution of breast and prostate cancer patients in the different tertiles**

| Variable                      | Scores               |      |                        |      | P     |
|-------------------------------|----------------------|------|------------------------|------|-------|
|                               | Breast cancer (N=56) |      | Prostate cancer (N=47) |      |       |
|                               | n                    | %    | n                      | %    |       |
| <b>Social support</b>         |                      |      |                        |      | .038  |
| Low score                     | 24                   | (43) | 11                     | (23) |       |
| Medium score                  | 20                   | (36) | 16                     | (34) |       |
| High score                    | 12                   | (21) | 20                     | (43) |       |
| <b>Depression</b>             |                      |      |                        |      | .190  |
| Low score                     | 16                   | (29) | 19                     | (41) |       |
| Medium score                  | 19                   | (34) | 17                     | (37) |       |
| High score                    | 21                   | (38) | 10                     | (22) |       |
| <b>Symptom distress</b>       |                      |      |                        |      | .324  |
| Low score                     | 16                   | (29) | 19                     | (40) |       |
| Medium score                  | 16                   | (29) | 14                     | (30) |       |
| High score                    | 24                   | (43) | 14                     | (30) |       |
| <b>Quality of life</b>        |                      |      |                        |      | .468  |
| Low score                     | 16                   | (30) | 15                     | (33) |       |
| Medium score                  | 25                   | (46) | 16                     | (35) |       |
| High score                    | 13                   | (24) | 15                     | (33) |       |
| <b>Self efficacy</b>          |                      |      |                        |      | .136  |
| Low score                     | 23                   | (42) | 10                     | (25) |       |
| Medium score                  | 15                   | (27) | 18                     | (45) |       |
| High score                    | 17                   | (31) | 12                     | (30) |       |
| <b>Assessment duration</b>    |                      |      |                        |      | .820  |
| Low use                       | 17                   | (32) | 17                     | (38) |       |
| Medium use                    | 17                   | (32) | 14                     | (31) |       |
| High use                      | 19                   | (36) | 14                     | (31) |       |
| <b>Interventions duration</b> |                      |      |                        |      | .602  |
| Low use                       | 19                   | (34) | 15                     | (33) |       |
| Medium use                    | 17                   | (30) | 18                     | (39) |       |
| High use                      | 20                   | (36) | 13                     | (28) |       |
| <b>Information duration</b>   |                      |      |                        |      | .211  |
| Low use                       | 17                   | (30) | 17                     | (38) |       |
| Medium use                    | 16                   | (29) | 17                     | (38) |       |
| High use                      | 23                   | (41) | 11                     | (24) |       |
| <b>Message duration</b>       |                      |      |                        |      | .182  |
| Low use                       | 16                   | (29) | 18                     | (39) |       |
| Medium use                    | 23                   | (41) | 11                     | (24) |       |
| High use                      | 17                   | (30) | 17                     | (37) |       |
| <b>Forum duration</b>         |                      |      |                        |      | <.001 |
| Low use                       | 9                    | (16) | 25                     | (54) |       |
| Medium use                    | 24                   | (43) | 10                     | (22) |       |
| High use                      | 23                   | (41) | 11                     | (24) |       |

Total percent for each score/use is over 100 % in some cases due to round offs.
